# Supplementary material for: Observation of horizontal temperature variations by a spatial heterodyne interferometer using single-sided interferograms
Source: Copernicus journal article supplement (doi:10.5194/amt-2023-74), 2023-04-17
Supplement: Supplementary file [file amt-2023-74-AC1-supplement.pdf]

# 1 Response to the comments of referee #1

2  
3 We thank the referee for their valuable and helpful comments. We have  
4 addressed all of them one-by-one in details as listed below. The comments  
5 are in bold and our replies are in regular font. The line numbers indicated in  
6 our replies are given with respect to the track change manuscript, and may  
7 differ from the revised manuscript.

## 8 **General and specific points:**

9 **To split the 2-D interferogram into two single-side interferograms**  
10 **around the zero optical path difference is the key process to suc-**  
11 **cessfully derive two temperature profiles. The temperature infor-**  
12 **mation comes mostly from the center of the interferogram, so it**  
13 **would be expected that the temperature retrieval is sensitive to the**  
14 **determination of ZOPD. The authors may consider to add some re-**  
15 **trieval results when ZOPD cannot be determined precisely, which**  
16 **could often happen during actual observations.**

17 The referee points out that it is crucial to know the location of the ZOPD. A  
18 sensitivity study was conducted by Ntokas et al. (2022), which showed that  
19 the ZOPD needs to be known on the sub-pixel scale, if it is not accounted for  
20 during the data processing or retrieval. This requirement is not meet in the  
21 raw data and therefore, correction methods needs to be applied. The feasi-  
22 bility of these methods is presented by Kleinert et al. (2014) and Ungermann  
23 et al. (2022). We added a discussion paragraph regarding this topic in Line  
24 269-276.

25 **The text has tendency to omit the definite article "the" in some of**  
26 **its sentences. It is recommended that the authors review and add**  
27 **"the" where needed.**

28 The revised text includes the necessary definite articles where applicable.

29 **The colored lines in some figures are sometimes difficult to distin-**  
30 **guish one from another, e.g., Fig.2(b), Fig. 10(b), Fig. A1(a), and**

31 **I would suggest to either change the colorbar or use markers if**  
32 **possible.**

33 We adjusted the above mentioned figures to increase their visibility. Specif-  
34 ically, for Fig.2(b) and Fig.10(b), we change the colors. Note for Fig.2 that  
35 on behalf of referee #2, the input temperature is shown separately for solar  
36 minimum and solar maximum conditions, and the production mechanisms  
37 and the estimated intensity count per pixel are shown individually for day-  
38 and night-time conditions. Furthermore in Fig.6, the temperature uncer-  
39 tainty is presented individually for day- and night-time simulations as well,  
40 to be consistent. For Fig.A1(a), we adjusted the colors and removed the stan-  
41 dard deviation of the noisy spectra, which are not needed for the discussion.  
42 Discussions, captions and references of the figures are adjusted accordingly.

43 **Line 125-157: For O2 A band, self-absorption cannot be omitted**  
44 **below 90 km. When no self-absorption is assumed for above 80**  
45 **km, it will affect the temperature retrieval to some extent between**  
46 **80 km and 90 km. Authors may add some discussions on this.**

47 This comment led us to further investigation on this topic. In Fig. 1 we  
48 present the radiance distribution along the line of sight (LOS) normalized  
49 to the maximum of each LOS. The limit of 80km was previously derived  
50 by Fig. 1a. However, investigating the tangent altitudes between 80km and  
51 90km reveals that the lower most altitudes are affected by self-absorption,  
52 where 50% from the radiance come from the strong signal region around  
53 90km. We therefore agree with the referee and adjusted the manuscript in  
54 Line 137-144 and in the conclusion in Line 367-369.

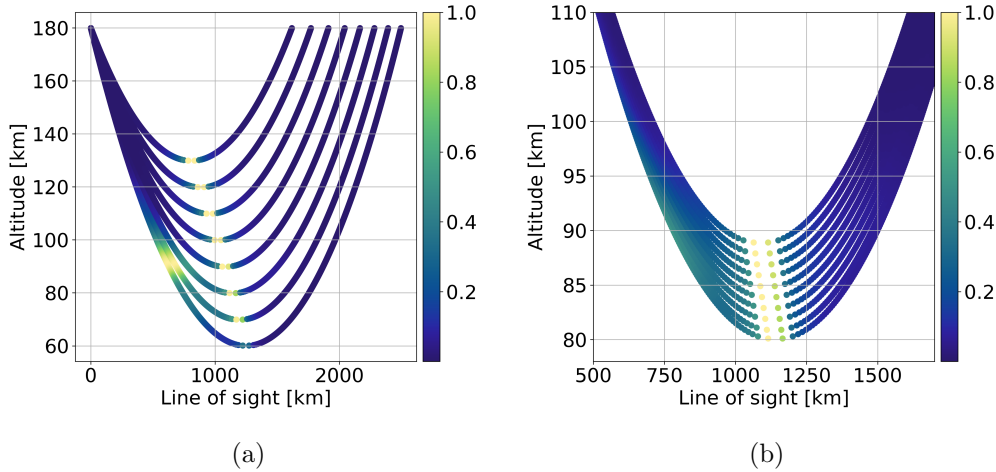

Figure 1: Radiance distribution along the line of sight (LOS) normalized to the maximum of each LOS for (a) selected LOS over the full atmospheric vertical grid from 60km to 180km and (b) a zoom in of the tangent altitudes between 80km and 90km;

55 **Line 228-230: "values ..."** is not clear in this sentence, please con-  
 56 **sider to rephrase/complement the sentence.**

57 We reformulated the sentence accordingly in Line 261-264.

## 58 **Technical comments and typos:**

59 • **Line 18: "...(Vincent (2015))..."** would be **"(Vincent, 2015)"**  
 60 **and also in the other indirect citations in the text, e.g., L32.**

61 We changed the text accordingly in Line 18, 44 and 107.

62 • **Line 20: "...summarize..."** would be **"summarized"**

63 We changed the text accordingly in Line 20-21.

64 • **Line 22: "...point out..."** would be **"pointed out"**

65 We added in the text accordingly in Line 22.

66 • **Line 22: "...underline...outlines..."** would be **"underlined...outlined"**

67 We changed the text accordingly in Line 23-24.

- 68     • **Line 45:** "if it it possible..." would be "if it is possible..."  
69         We added in the text accordingly in Line 61.
- 70     • **Line 88:** "...a electronic transition..." would be "an electronic  
71         transition..."  
72         We changed the text accordingly in Line 104.
- 73     • **Line 89:** "..., which" would be "...., and" / "..., where"  
74         We changed the text accordingly in Line 105-106.
- 75     • **Line 132:** "...which..." would be "whose"  
76         We changed the text accordingly in Line 162.
- 77     • **Line 138:** "...show..." would be "showed"  
78         We changed the text accordingly in Line 169.
- 79     • **Line 139:** "...1.4 and 1.6 refers..." to "1.4 and 1.6 refer"  
80         We changed the text accordingly in Line 171.
- 81     • **Line 325:** "...decreases..." to "reduces"  
82         We changed the text accordingly in Line 370.
- 83     • **Line 326:** duplicated "that" in the sentence  
84         We changed the text accordingly in Line 371.
- 85     • **Line 333:** "...affects..." to "affect"  
86         We changed the text accordingly in Line 378.

## 87   References

- 88   A. Kleinert, F. Friedl-Vallon, T. Guggenmoser, M. Höpfner, T. Neu-  
89   bert, R. Ribalda, M. K. Sha, J. Ungermann, J. Blank, A. Eber-  
90   soldt, E. Kretschmer, T. Latzko, H. Oelhaf, F. Olschewski, and  
91   P. Preusse. Level 0 to 1 processing of the imaging Fourier transform  
92   spectrometer GLORIA: generation of radiometrically and spectrally cali-  
93   brated spectra. *Atmospheric Measurement Techniques*, 7(12):4167–4184,  
94   Dec. 2014. ISSN 1867-8548. doi: 10.5194/amt-7-4167-2014. URL  
95   <https://amt.copernicus.org/articles/7/4167/2014/>.

- 96 K. Ntokas, M. Kaufmann, J. Ungermann, P. Preusse, and M. Riese.  
97 Retrieval of gravity wave parameters using half interferograms  
98 measured by CubeSats. In C. D. Norton and S. R. Babu, ed-  
99 itors, *CubeSats and SmallSats for Remote Sensing VI*, page 9,  
100 San Diego, United States, Sept. 2022. SPIE. ISBN 978-1-  
101 5106-5456-3 978-1-5106-5457-0. doi: 10.1117/12.2633460. URL  
102 <https://www.spiedigitallibrary.org/conference-proceedings-of-spie/12236/2633460>
- 103 J. Ungermann, A. Kleinert, G. Maucher, I. Bartolomé, F. Friedl-Vallon,  
104 S. Johansson, L. Krasauskas, and T. Neubert. Quantification and mit-  
105 igation of the instrument effects and uncertainties of the airborne limb  
106 imaging FTIR GLORIA. *Atmospheric Measurement Techniques*, 15(8):  
107 2503–2530, Apr. 2022. ISSN 1867-8548. doi: 10.5194/amt-15-2503-2022.  
108 URL <https://amt.copernicus.org/articles/15/2503/2022/>.
