# Supplementary material for: Observation of horizontal temperature variations by a spatial heterodyne interferometer using single-sided interferograms
Source: Copernicus journal article supplement (doi:10.5194/amt-2023-74), 2023-04-17
Supplement: Supplementary file [file amt-2023-74-AC2-supplement.pdf]

# 1 Response to the comments of referee #2

2

3 We thank the referee for their review including detailed comments and sug-  
4 gestions. It will strengthen the output of the study. We have addressed all  
5 of them one-by-one in details as listed below. The comments are in bold and  
6 our replies are in regular font. The line numbers indicated in our replies are  
7 given with respect to the track change manuscript, and may differ from the  
8 revised manuscript.

## 9 **General issues:**

10 **You absolutely cannot ignore self-absorption in the 80-85 km re-**  
11 **gion. Even in the 85-90 km region it is not negligible. If you**  
12 **want to include this region (80-90 km), you must account for self**  
13 **absorption.**

14 This comment led us to further investigation on this topic. In Fig. 1 we  
15 present the radiance distribution along the line of sight (LOS) normalized  
16 to the maximum of each LOS. The limit of 80km was previously derived  
17 by Fig. 1a. However, investigating the tangent altitudes between 80km and  
18 90km reveals that the lower most altitudes are affected by self-absorption,  
19 where 50% from the radiance come from the strong signal region around  
20 90km. We therefore agree with the referee and adjusted the manuscript in  
21 Line 137-144 and in the conclusion in Line 367-369.

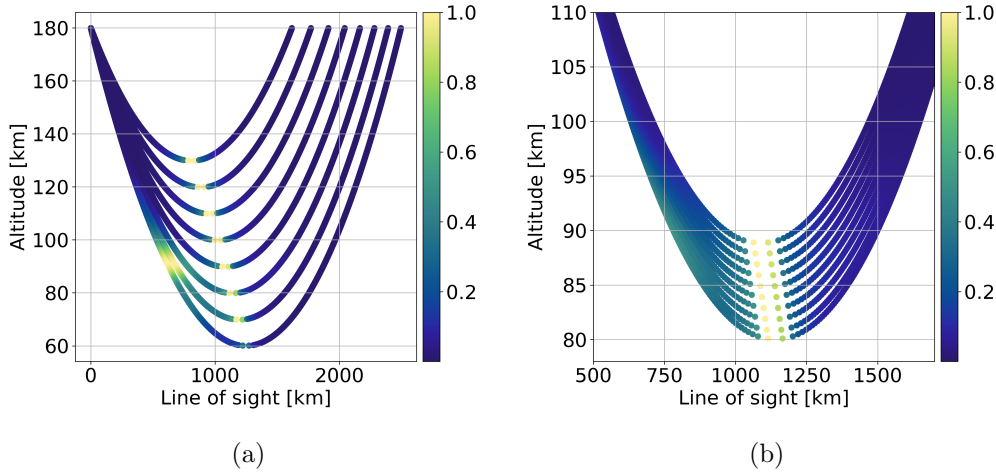

Figure 1: Radiance distribution along the line of sight (LOS) normalized to the maximum of each LOS for (a) selected LOS over the full atmospheric vertical grid from 60km to 180km and (b) a zoom in of the tangent altitudes between 80km and 90km;

22 **It is not enough to simply say you’re “using HITRAN” to forward**  
 23 **model the line intensities. At line 147, you say that you convolve**  
 24 **the line strengths with the ILS. You’ve skipped a few steps here.**  
 25 **How are you accounting for broadening? What types of broadening**  
 26 **are you accounting for? Are you actually just convolving the line**  
 27 **strengths? Because you need to convolve the emission spectrum**  
 28 **(which you calculate from the line strengths), see Babcock and**  
 29 **Herzberg, 1948 (doi:10.1086/145062).**

30 The forward model has been tested for Doppler broadening referring to a  
 31 Gauss shape and Doppler and pressure broadening referring to a Voigt shape.  
 32 The results are depicted in Figure 2. The spectrally integrated radiance is  
 33 examined in Figure 2a. It is observed that the simulation using the Gaussian  
 34 line shape exhibits slight deviations for tangent altitudes below 80km. Nev-  
 35 ertheless, these deviations are extremely small and can be neglected. The  
 36 slightly enhanced flanks of the Voigt line shape, attributed to the pressure-  
 37 induced Lorentzian shape, become apparent only when the differences are  
 38 amplified, as demonstrated in Figure 2b. Thus, only Doppler broadening is  
 39 considered in the forward model.

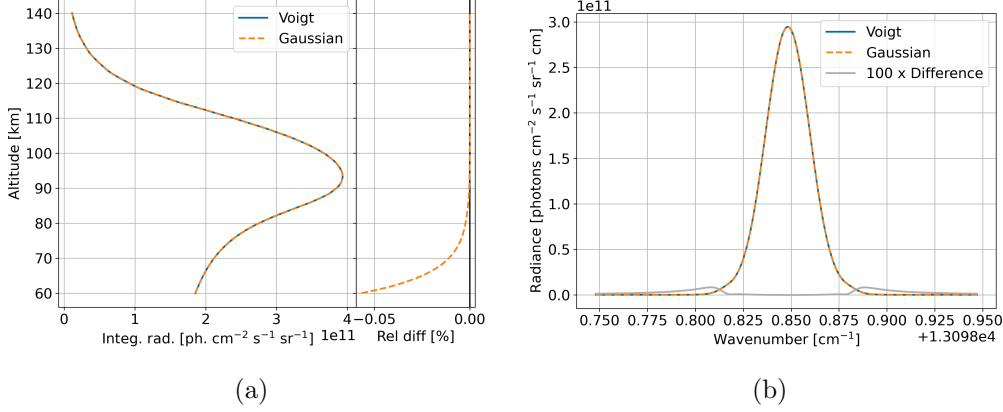

Figure 2: (a) Spectrally integrated radiance using Voigt and Gaussian line shape; right panel shows the difference of the simulation using a Gaussian line relative to the simulation using Voigt line shape; (b) strongest emission line for tangent altitude 60km using the Voigt line shape compared to the same emission line in the simulation using Gaussian line shape; the difference (Voigt - Gaussian) is amplified by a factor of 100;

40 Regarding the convolution of the atmospheric spectrum with the instrument  
 41 line shape (ILS), it should be noted that the emission lines are extremely  
 42 narrow compared to the ILS width as shown in Figure 3, and thus can be  
 43 approximated by a Dirac impulse. The convolution of a function with a  
 44 Dirac impulse is the function itself and thus, the ILS can be positioned at  
 45 the position of the emission line and scaled by the line strength. Figure 3  
 46 shows that the two methods show only small differences and retrieve the same  
 47 temperature, where the line strength method is used in the forward model  
 48 for both cases. Furthermore in this study, the interferogram is built from the  
 49 line strength it self, as shown in Eq.(1). Thus the forward calculation and  
 50 the retrieval is consistent in itself. Some discussion is added in Line 157-162.

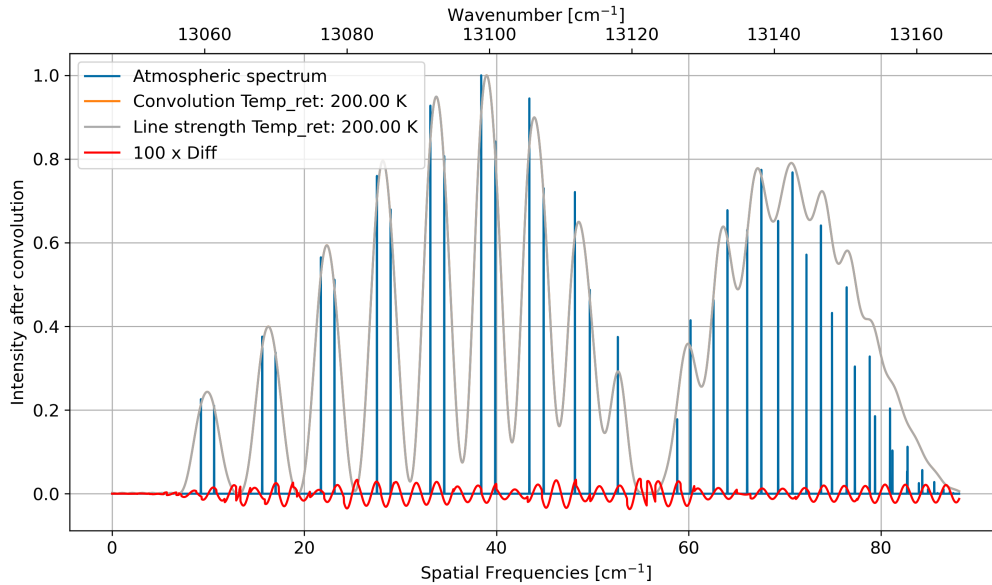

Figure 3: Normalized atmospheric spectrum with resolved narrow emission lines of a homogeneous gas cell for temperature equal to 200K; 'Convolution' refers to the atmospheric spectrum convoluted with the ILS; 'Line strength' refers to the method presented in the paper, where the ILS of each emission line is scaled with the line strength; Temperature indicated in the labels are the retrieved temperature using line strength method in both cases;

51 **The discussion of temperature precision is good. However, a discussion**  
 52 **on accuracy is also needed, especially for the daytime retrievals. Specifically,**  
 53 **on how you're going to deal with background solar radiation and stray light,**  
 54 **and how those will affect the accuracy of the temperature retrievals. It's only**  
 55 **at altitudes very close to 90 km where the background solar signal is somewhat**  
 56 **negligible compared to the airglow signal. And, if this is intended to be on a**  
 57 **nanosat, you're likely going to have limitations on the size of baffle you can**  
 58 **use, which means stray light will certainly be an issue. The source of that stray**  
 59 **light will be from the bright Earth below, which will have a complicated self-**  
 60 **absorption A-band signal, ie, it's not a simple linear function across the**  
 61 **spectrum that you need to subtract. These background signals need to be**  
 62 **accounted for and discussed.**  
 63  
 64

65 We agree with the referee that the day-time observations are affected by di-

66 rect solar radiation and stray light. First sensitivity studies were conducted  
67 recently, which showed that the baffle is long enough to neglect direct solar  
68 radiation if the sun is not in or very close to the field of view. Stray light due  
69 to upwelling radiation specifically from the ground however, affects largely  
70 the lower and upper tangent altitudes. Further investigations on this topic  
71 and possible correction methods need to be developed for an accurate tem-  
72 perature estimation. This however will not be included in this study. This  
73 study mainly focuses on the retrieval of horizontal temperature variations.  
74 A small discussion on this is added in Line 150-153.

## 75 **Specific issues:**

76 **Introduction:** there have been two instruments launched recently  
77 that also use the A-band to measure MLT temperatures, MIGHTI  
78 on ICON, and the Swedish MATS satellite instrument. Please  
79 mention/reference these as well.

80 We considered the referee’s suggestion and added some information of MIGHTI  
81 and MATS instrument in Line 30-37.

82 **Line 26:** This sentence is quite vague, please elaborate on why/where/how  
83 the instrument was developed.

84 We elaborated more on the development process of the instrument in Line  
85 37-41.

86 **Lines 26-28:** This section is somewhat misleading. It sounds like  
87 you’re saying that the first instrument (described in Kauffman et  
88 al. 2018) was successful in measuring temperature profiles. In that  
89 paper, it says that the instrument worked nominally on a rocket  
90 launch, however, wasn’t able to produce temperature profiles. And  
91 the second part of this section makes it sound like a second instru-  
92 ment has been built and is ready to be tested. Is this the case? It  
93 should be made clear that Chen et al. 2022 is a simulation study.

94 We restructured the section in Line 37-41 and Line 45-49 to address this  
95 comment in accordance with the previous comment. Furthermore, it is made  
96 clear that Chen et al. 2022 is a simulation study in Line 60-61.

97 **Line 55 (and throughout text):** “asses” should be “assess”

98 We corrected the spelling in Line 70, 71, 202 and 336.

99 **Figure 2: It would be helpful to split these into solar max and**  
100 **solar min in different plots. Also, maybe separate daytime and**  
101 **nighttime**

102 We welcome the suggestion of the referee and split the presented 1-D tem-  
103 perature profile into solar minimum and solar maximum condition. Further-  
104 more, the production mechanisms and the expected intensity count per pixel  
105 are split into day- and night-time simulations, respectively in Fig.2b,e and  
106 2c,f. Also, the colors has been changed of Fig.2b to address referee #1. Fur-  
107 thermore in Fig.6, the temperature uncertainty is presented individually for  
108 day-time and night-time simulations as well, to be consistent. Discussions,  
109 captions and references of the figures are adjusted accordingly.

110 **Fig. 10b: the legend should also include the grey interferogram**  
111 **with no gradient**

112 Fig. 10b and its associated caption has been updated, to increase its com-  
113 prehensibility.

114 **Line 316: I don't recall any special attention being given to results**  
115 **above 120 km. Is this the intended altitude?**

116 120km was the upper limit of the vertical field of view of previous publications  
117 (Chen et al., 2022; Kaufmann et al., 2018). This is the first simulation study,  
118 which explores the upper limit mainly during day-time conditions, as the  
119 lower part of the field of view is affected by self-absorption and stray light  
120 from the ground. However, we agree with the referee that the formulation  
121 can be misleading. We therefore reformulated the sentence in Line 359-360.

## 122 References

123 Q. Chen, K. Ntokas, B. Linder, L. Krasauskas, M. Ern, P. Preusse,  
124 J. Ungermann, E. Becker, M. Kaufmann, and M. Riese. Satel-  
125 lite observations of gravity wave momentum flux in the meso-  
126 sphere and lower thermosphere (MLT): feasibility and require-  
127 ments. *Atmospheric Measurement Techniques*, 15(23):7071–7103, Dec.  
128 2022. ISSN 1867-8548. doi: 10.5194/amt-15-7071-2022. URL  
129 <https://amt.copernicus.org/articles/15/7071/2022/>.

130 M. Kaufmann, F. Olschewski, K. Mantel, B. Solheim, G. Shepherd, M. Deiml,  
131 J. Liu, R. Song, Q. Chen, O. Wroblowski, D. Wei, Y. Zhu, F. Wag-  
132 ner, F. Loosen, D. Froehlich, T. Neubert, H. Rongen, P. Knieling,  
133 P. Toumpas, J. Shan, G. Tang, R. Koppmann, and M. Riese. A highly  
134 miniaturized satellite payload based on a spatial heterodyne spectrom-  
135 eter for atmospheric temperature measurements in the mesosphere and  
136 lower thermosphere. *Atmospheric Measurement Techniques*, 11(7):3861–  
137 3870, July 2018. ISSN 1867-8548. doi: 10.5194/amt-11-3861-2018. URL  
138 <https://amt.copernicus.org/articles/11/3861/2018/>.
